# Supplementary material for: Effects of Endobacterium (Stenotrophomonas maltophilia) on Pathogenesis-Related Gene Expression of Pine Wood Nematode (Bursaphelenchus xylophilus) and Pine Wilt Disease
Source: PubMed Central journal article supplement (PMC4926329; doi:10.3390/ijms17060778), 2016-05-25
Supplement: ijms-17-00778-s001.pdf [file ijms-17-00778-s001.pdf]

# Supplementary Materials: Effects of Endobacterium (*Stenotrophomonas maltophilia*) on Pathogenesis-Related Gene Expression of Pine Wood Nematode (*Bursaphelenchus xylophilus*) and Pine Wilt Disease

Long-Xi He, Xiao-Qin Wu, Qi Xue and Xiu-Wen Qiu

**Table S1.** The results of sequences of differently treated *B. xylophilus* mapped to the reference genome.

| Map to Genome (Genome/Gene)       | <i>B. xylophilus</i> with Different Treatment |               |               |
|-----------------------------------|-----------------------------------------------|---------------|---------------|
|                                   | Bx_a                                          | Bx_b          | Bx_Fungus     |
| Total reads                       | 47,931,208                                    | 48,015,322    | 48,031,606    |
| Total basepairs                   | 4,313,808,720                                 | 4,321,378,980 | 4,322,844,540 |
| Total mapped reads (percentage)   | 75.43%/71.58%                                 | 75.06%/72.66% | 75.04%/71.98% |
| Perfect match (percentage)        | 54.33%/52.65%                                 | 54.2%/53.78%  | 54.48%/53.51% |
| Mismatch $\leq$ 5 bp (percentage) | 21.11%/18.93%                                 | 20.86%/18.88% | 20.56%/18.47% |
| Unique match (percentage)         | 74.02%/70.78%                                 | 73.78%/71.88% | 73.79%/71.26% |
| Multi-position match (percentage) | 1.41%/0.8%                                    | 1.27%/1/0.78% | 1.25%/0.72%   |
| Total unmapped reads (percentage) | 24.57%/28.42%                                 | 24.94%/27.34% | 24.96%/28.02% |

**Table S2.** Primer sequences of differentially expressed genes in *B. xylophilus* for qRT-PCR analysis.

| Gene ID         | Gene Name            | Function                           | Primer Sequence (5' to 3')                          |
|-----------------|----------------------|------------------------------------|-----------------------------------------------------|
| BUX.s01109.547  | <i>Cbr-mit-7</i>     | Thyroid peroxidase                 | F: AACAAATGAATCCCTCCTG<br>R: GTGACCGAAACGATAGGC     |
| BUX.s01661.75   | <i>Bxpe1</i>         | Pectate lyase                      | F: AAGAGCGGGCAGACCTAC<br>R: GGATTTCACAGACAACAT      |
| BUX.s00364.216  | <i>Cre-col-97</i>    | Collagen protein                   | F: AAACAACACTACCCACCATCCTT<br>R: TTCCTTGGCGTCCATCTT |
| BUX.s00055.267  | <i>Bx-col-2</i>      | CBN-col-68 protein                 | F: TTCTGCGTTCACAGATCCAA<br>R: CGGCGTCATCTCCGTAAGT   |
| BUX.s00713.1002 | <i>gut esterase1</i> | Carboxylesterase                   | F: CTCAAATGGGTCTATGACA<br>R: GGCTTAGAGTAGGGAGAAA    |
| BUX.s00813.53   | <i>cath1</i>         | Cathepsin F                        | F: GTAATCATCGCTGTAATCTGT<br>R: ATTCGTTCAAGGGTTTCT   |
| BUX.s00813.52   | <i>Cathespin L</i>   | Cathespin L                        | F: ATGTAATGGCGGATGGTC<br>R: TGGATTTGCAGCTAGGAA      |
| BUX.s01254.165  | <i>ZDHHC20</i>       | ZDHHC20 Protein                    | F: GAATAGTCCGAGACTCAAAT<br>R: TCGTATCTTCCTCGTCA     |
| BUX.s00116.359  | <i>Protein K07E3</i> | Catalytic activity                 | F: GGACCGACCTTTGGGATT<br>R: CGGCAGCGAGGAGATTGT      |
| BUX.s00532.5    | <i>Bx-col-3</i>      | Juvenile development               | F: ATTACGAGAACCGCATCAAAGC<br>R: TGGGCAGCGTGAAGCAGA  |
| BUX.s00116.877  | <i>Bx-col-4</i>      | Juvenile development               | F: CACTCGGTTCTCGGCAAAT<br>R: ACGGGCGGTTCTGTTGGA     |
| BUX.s01518.49   | <i>Cbr-sqt-3</i>     | Embryo development                 | F: AGTCCGATGGCCGTATGAA<br>R: TGACCTGGCTGACGTAGTTGTA |
| BUX.s01254.333  | <i>GST-6</i>         | Glutathione S-transferase activity | F: CCCATCTACAACAACCTCC<br>R: CAAGTATTCGCTGACCACA    |
| BUX.s00579.85   | <i>Bx-vap1</i>       | Venom allergen-like protein VAP1   | F: GCCCATAACAACCTTCGG<br>R: CATTCGTCGGCTTTGGAT      |
| BUX.s00397.15   | <i>Bx-C12</i>        | Beta-1,4-endoglucanase activity    | F: ACGGATTTGCTGCTGTGA<br>R: CAGGTAGCCGACTCCACA      |
| BUX.s00713.800  | <i>Cbr-fmo-4</i>     | Monoxygenase activity              | F: GACTACAACAACGGATGG<br>R: TTGGCTTCAAACGACTCTAC    |

F, forward primer; R, reverse primer.

**Table S3.** The high differently expressed genes in *B. xylophilus* treated with endobacterium and wild-type *B. xylophilus*. Bx\_b: *B. xylophilus* treated with endobacterium, Bx\_w: fungus *B. xylophilus*. ‘-’ represent down-regulated.

| Gene ID         | Annotation                                                     | Change Fold in Bx_b (Fold) | Change Fold in Bx_Fungus (Fold) |
|-----------------|----------------------------------------------------------------|----------------------------|---------------------------------|
| BUX.s01147.112  |                                                                | -10.47                     | -4.08                           |
| BUX.s00240.28   |                                                                | -9.02                      | -2.01                           |
| BUX.s00364.216  | Hypothetical protein CRE_26523                                 | -8.84                      | -3.04                           |
| BUX.s00240.41   |                                                                | -7.31                      | -6.41                           |
| BUX.s00116.877  |                                                                | -6.50                      | -3.71                           |
| BUX.s00116.209  |                                                                | -6.07                      | -3.57                           |
| BUX.s01143.351  | <i>C. briggsae</i> CBR-GRL-9 protein                           | -5.98                      | -2.69                           |
| BUX.s00351.83   |                                                                | -5.75                      | -4.93                           |
| BUX.s00055.267  | CBN-COL-68 protein                                             | -5.71                      | -2.70                           |
| BUX.s01145.106  | <i>C. briggsae</i> CBR-COL-156 protein                         | -5.58                      | -3.13                           |
| BUX.s01518.47   | Hypothetical protein CRE_05777                                 | -5.49                      | -2.57                           |
| BUX.s00813.30   | Hypothetical protein WUBG_07659                                | -5.36                      | -2.31                           |
| BUX.s00358.44   |                                                                | -5.34                      | -4.23                           |
| BUX.s01661.24   | I-Branching enzyme family protein                              | -5.33                      | -3.66                           |
| BUX.s01518.49   | Hypothetical protein CAEBREN_32352                             | -5.26                      | -4.43                           |
| BUX.s01254.267  | Protein COL-65                                                 | -5.24                      | -8.82                           |
| BUX.s01147.16   |                                                                | -5.21                      | -3.00                           |
| BUX.s01653.305  | Nematode cuticle collagen N-terminal domain containing protein | -5.16                      | -4.15                           |
| BUX.s01109.625  | Hypothetical protein CAEBREN_25275                             | -5.14                      | -3.96                           |
| BUX.s01653.308  | <i>C. briggsae</i> CBR-COL-156 protein                         | -5.09                      | -3.49                           |
| BUX.s01259.16   | Hypothetical protein CRE_11135                                 | -5.00                      | -2.31                           |
| BUX.s01513.216  | Hypothetical protein CBG20858                                  | -5.00                      | -2.30                           |
| BUX.s00351.199  | Protein H10E21.4                                               | -4.96                      | -3.26                           |
| BUX.s01254.196  | Hypothetical protein CRE_01635                                 | -4.95                      | -3.27                           |
| BUX.s00116.244  |                                                                | -4.94                      | -2.51                           |
| BUX.s01142.4    | CRE-COL-130 protein                                            | -4.93                      | -5.65                           |
| BUX.s00713.745  |                                                                | -4.93                      | -4.21                           |
| BUX.s00100.1    |                                                                | -4.81                      | -2.54                           |
| BUX.s00422.105  | Hypothetical protein CAEBREN_15197                             | -4.77                      | -2.06                           |
| BUX.s00609.14   | <i>C. briggsae</i> CBR-COL-123 protein                         | -4.71                      | -3.14                           |
| BUX.s01063.14   |                                                                | -4.67                      | -3.25                           |
| BUX.s01653.307  | <i>C. briggsae</i> CBR-COL-65 protein                          | -4.59                      | -3.47                           |
| BUX.s00252.138  | Hypothetical protein LOAG_00897                                | -4.53                      | -5.00                           |
| BUX.s00298.1    |                                                                | -4.52                      | -5.44                           |
| BUX.s00747.2    | Hypothetical protein Bm1_36710                                 | -4.47                      | -4.32                           |
| BUX.s01109.128  | Cuticle collagen 13                                            | -4.45                      | -2.91                           |
| BUX.s00532.5    | Cuticle preprocollagen                                         | -4.45                      | -6.86                           |
| BUX.s01518.48   | Hypothetical protein CAEBREN_32352                             | -4.26                      | -5.37                           |
| BUX.s00713.945  | Cuticular collagen                                             | -4.25                      | -2.91                           |
| BUX.s00298.56   | Hypothetical protein CAEBREN_10142                             | -4.21                      | -2.81                           |
| BUX.s00460.301  | Cuticle collagen 13 precursor                                  | -4.21                      | -5.41                           |
| BUX.s00119.27   | <i>C. briggsae</i> CBR-NHX-3 protein                           | -4.20                      | -2.72                           |
| BUX.s00713.946  | Collagen protein                                               | -4.17                      | -2.52                           |
| BUX.s00713.944  | Col-180-1                                                      | -4.16                      | -3.63                           |
| BUX.s01144.229  |                                                                | -4.14                      | -5.73                           |
| BUX.s01092.240  |                                                                | -4.13                      | -3.54                           |
| BUX.s00579.123  |                                                                | -4.12                      | -3.00                           |
| BUX.s00358.45   |                                                                | -4.11                      | -3.89                           |
| BUX.s00252.94   | Hypothetical protein LOAG_17054                                | -4.10                      | -3.72                           |
| BUX.s00647.64   |                                                                | -4.08                      | -3.66                           |
| BUX.s01429.2    |                                                                | -3.98                      | -3.91                           |
| BUX.s00460.148  | DB module family protein                                       | -3.98                      | -2.40                           |
| BUX.s01254.268  | CRE-ROL-8 protein                                              | -3.95                      | -2.78                           |
| BUX.s00713.1056 |                                                                | -3.93                      | -5.58                           |
| BUX.s01092.72   | Cathepsin B-like cysteine protease 2                           | -3.93                      | -3.41                           |
| BUX.s00116.36   | Hypothetical protein CBG09274                                  | -3.93                      | -2.74                           |
| BUX.s01144.113  | Hypothetical protein LOAG_18235                                | -3.88                      | -3.29                           |

Table S3. Cont.

| Gene ID         | Annotation                                                        | Change Fold in<br>Bx_b (Fold) | Change Fold in<br>Bx_Fungus (Fold) |
|-----------------|-------------------------------------------------------------------|-------------------------------|------------------------------------|
| BUX.s01187.19   | Hypothetical protein Bm1_50485                                    | -3.87                         | -2.19                              |
| BUX.s01142.58   |                                                                   | -3.85                         | -4.47                              |
| BUX.s00333.136  | C. briggsae CBR-LON-3 protein                                     | -3.80                         | -3.65                              |
| BUX.s00240.3    | Protein LON-3                                                     | -3.79                         | -3.82                              |
| BUX.s01254.121  | Nematode cuticle collagen N-terminal domain<br>containing protein | -3.78                         | -4.98                              |
| BUX.s01143.148  | Hypothetical protein CBG23119                                     | -3.78                         | -3.25                              |
| BUX.s00110.82   | Hypothetical protein CBG14246                                     | -3.78                         | -2.52                              |
| BUX.s00055.304  | Hypothetical protein LOAG_01570                                   | -3.77                         | -2.85                              |
| BUX.s00532.4    | Putative COLLAGEN                                                 | -3.74                         | -6.05                              |
| BUX.s00713.39   | Protein C25E10.12                                                 | -3.73                         | -3.77                              |
| BUX.s00139.133  | C. briggsae CBR-COL-40 protein                                    | -3.71                         | -3.22                              |
| BUX.s01142.5    | collagen protein                                                  | -3.69                         | -5.10                              |
| BUX.s00036.123  | Hypothetical protein Bm1_38265                                    | -3.67                         | -6.00                              |
| BUX.s00713.1009 | Hypothetical protein KGM_03271                                    | -3.60                         | -2.66                              |
| BUX.s00116.149  | Ground-like domain containing protein                             | -3.60                         | -3.55                              |
| BUX.s00364.224  | COL5A1 protein                                                    | -3.59                         | -6.91                              |
| BUX.s00600.66   | Hypothetical protein LOAG_08929                                   | -3.58                         | -3.92                              |
| BUX.s01653.296  | C. briggsae CBR-COL-107 protein                                   | -3.57                         | -6.55                              |
| BUX.s01109.130  | Protein COL-160                                                   | -3.56                         | -5.32                              |
| BUX.s00351.445  | Protein ELO-4                                                     | -3.48                         | -2.85                              |
| BUX.s00647.95   | Hypothetical protein CRE_17077                                    | -3.48                         | -5.15                              |
| BUX.s01109.332  | Hypothetical protein LOAG_04512                                   | -3.47                         | -4.08                              |
| BUX.s01063.43   | CRE-TAG-297 protein                                               | -3.47                         | -2.34                              |
| BUX.s01038.94   | Hypothetical protein CAEBREN_16721                                | -3.43                         | -2.14                              |
| BUX.s00460.489  | Hypothetical protein CRE_20821                                    | -3.43                         | -3.90                              |
| BUX.s00713.1051 |                                                                   | -3.41                         | -2.29                              |
| BUX.s01438.96   |                                                                   | -3.41                         | -2.16                              |
| BUX.s01143.316  |                                                                   | -3.40                         | -2.32                              |
| BUX.c00697.1    |                                                                   | -3.39                         | -3.29                              |
| BUX.s01145.76   | Hypothetical protein CAEBREN_06992                                | -3.39                         | -3.75                              |
| BUX.s01063.44   | C. briggsae CBR-TAG-297 protein                                   | -3.39                         | -3.46                              |
| BUX.s00579.3    |                                                                   | -3.39                         | -2.20                              |
| BUX.s00036.151  | CRE-COL-45 protein                                                | -3.39                         | -3.12                              |
| BUX.s01142.59   |                                                                   | -3.36                         | -5.00                              |
| BUX.s00713.40   | Protein WRT-8                                                     | -3.35                         | -2.22                              |
| BUX.s01109.547  | Protein MLT-7                                                     | -3.34                         | -2.44                              |
| BUX.s00119.37   | Hypothetical protein LOAG_04049                                   | -3.34                         | -2.39                              |
| BUX.s00964.26   | Hypothetical protein LOAG_05885                                   | -3.34                         | -2.52                              |
| BUX.s00961.57   |                                                                   | -3.31                         | -2.93                              |
| BUX.s01109.563  | Nematode cuticle collagen N-terminal domain<br>containing protein | -3.28                         | -3.21                              |
| BUX.s01092.247  |                                                                   | -3.27                         | -2.78                              |
| BUX.s01109.45   | Cuticlin 1                                                        | -3.27                         | -2.45                              |
| BUX.s01187.11   | Hypothetical protein CAEBREN_00254                                | -3.26                         | -2.34                              |
| BUX.s00351.186  | Hypothetical protein LOAG_06354                                   | -3.25                         | -3.50                              |
| BUX.s00725.36   | Hypothetical protein WUBG_10966                                   | -3.25                         | -3.94                              |
| BUX.s01144.96   | Nematode cuticle collagen N-terminal domain<br>containing protein | -3.24                         | -3.55                              |
| BUX.s00713.1123 | Hypothetical protein CAEBREN_14564                                | -3.24                         | -2.58                              |
| BUX.s00351.158  | C. briggsae CBR-PQN-46 protein                                    | -3.21                         | -2.24                              |
| BUX.s00055.287  | PAN domain-containing protein                                     | -3.20                         | -4.07                              |
| BUX.s00119.8    | CBN-CUT-1 protein                                                 | -3.20                         | -2.30                              |
| BUX.s00713.838  | Hypothetical protein DAPPUDRAFT_302039                            | -3.19                         | -2.72                              |
| BUX.s00813.67   | Protein BUS-12, isoform a                                         | -3.17                         | -4.35                              |
| BUX.s01178.2    | CRE-ELO-4 protein                                                 | -3.17                         | -2.70                              |
| BUX.s00649.21   | Hypothetical protein Bm1_38120                                    | -3.15                         | -4.32                              |
| BUX.s00422.286  | Lipase family protein                                             | -3.15                         | -2.74                              |
| BUX.s00422.163  | Hypothetical protein LOAG_05181                                   | -3.14                         | -2.94                              |

Table S3. Cont.

| Gene ID        | Annotation                                                      | Change Fold in<br>Bx_b (Fold) | Change Fold in<br>Bx_Fungus (Fold) |
|----------------|-----------------------------------------------------------------|-------------------------------|------------------------------------|
| BUX.s00460.502 | CBN-WRT-4 protein                                               | -3.13                         | -3.61                              |
| BUX.s00364.94  | Protein DPY-2                                                   | -3.13                         | -5.12                              |
| BUX.s01254.333 | Protein GST-6                                                   | -3.13                         | -3.34                              |
| BUX.s00139.89  | Hypothetical protein BRAFLDRAFT_59053                           | -3.11                         | -11.95                             |
| BUX.s00713.779 | CRE-MLT-11 protein                                              | -3.10                         | -2.62                              |
| BUX.s00351.118 | CBR-CBN-1 protein                                               | -3.07                         | -3.76                              |
| BUX.s00713.209 | Collagen col-34                                                 | -3.06                         | -2.50                              |
| BUX.s01281.492 |                                                                 | -3.06                         | -2.48                              |
| BUX.s00351.297 | Hypothetical protein LOAG_04701                                 | -3.06                         | -2.34                              |
| BUX.s00333.141 | Cuticlin 1, partial                                             | -3.05                         | -2.58                              |
| BUX.s00543.37  | <i>C. briggsae</i> CBR-DPY-8 protein                            | -3.05                         | -2.85                              |
| BUX.s00351.228 | Protein LET-805, isoform b                                      | -3.04                         | -2.99                              |
| BUX.s00649.20  | Protein LPR-6, isoform a                                        | -3.01                         | -2.91                              |
| BUX.s01063.215 | Protein PTR-18                                                  | -3.01                         | -2.60                              |
| BUX.s01662.136 | CRE-SQT-2 protein                                               | -3.00                         | -4.13                              |
| BUX.s00351.227 | Hypothetical protein<br>H19M22.2— <i>Caenorhabditis elegans</i> | -2.99                         | -2.46                              |
| BUX.s01494.1   | Protein B0365.9                                                 | -2.98                         | -5.63                              |
| BUX.s00460.374 | WRT-10 protein                                                  | -2.98                         | -5.78                              |
| BUX.c00436.1   |                                                                 | -2.97                         | -3.96                              |
| BUX.s01661.37  | Protein COL-46                                                  | -2.97                         | -3.95                              |
| BUX.s01147.26  |                                                                 | -2.95                         | -2.95                              |
| BUX.s00813.116 | LPR-4 protein                                                   | -2.95                         | -3.87                              |
| BUX.s00364.221 | Collagen protein                                                | -2.95                         | -5.45                              |
| BUX.s00055.338 | Hypothetical protein Bm1_38110                                  | -2.94                         | -3.25                              |
| BUX.s01144.205 |                                                                 | -2.94                         | -3.63                              |
| BUX.s00364.218 | COL5A1 protein                                                  | -2.93                         | -2.14                              |
| BUX.s00298.242 | Hypothetical protein CAEBREN_13878                              | -2.93                         | -2.48                              |
| BUX.s00116.855 |                                                                 | -2.89                         | -3.49                              |
| BUX.s01109.545 | Hypothetical protein CAEBREN_06068                              | -2.88                         | -2.80                              |
| BUX.s01109.461 |                                                                 | -2.88                         | -2.16                              |
| BUX.s00983.1   | Hypothetical protein LOAG_17799                                 | -2.86                         | -4.11                              |
| BUX.s01653.440 |                                                                 | -2.85                         | -2.66                              |
| BUX.s00713.673 |                                                                 | -2.85                         | -2.38                              |
| BUX.s00116.713 | CRE-PTR-4 protein                                               | -2.83                         | -2.64                              |
| BUX.s01281.367 | Period, partial                                                 | -2.82                         | -3.26                              |
| BUX.s00364.92  | Hypothetical protein LOAG_01555                                 | -2.82                         | -3.42                              |
| BUX.s01254.264 | Cuticular collagen                                              | -2.80                         | -2.68                              |
| BUX.s01187.18  | Hypothetical protein WUBG_01354                                 | -2.79                         | -2.04                              |
| BUX.s00460.143 | Hypothetical protein CRE_22550                                  | -2.79                         | -2.20                              |
| BUX.s01226.79  | Hypothetical protein LOAG_17054                                 | -2.79                         | -3.67                              |
| BUX.s01653.325 | Hypothetical protein WUBG_06137                                 | -2.78                         | -2.25                              |
| BUX.s00116.812 | Hypothetical protein Bm1_28255                                  | -2.77                         | -3.35                              |
| BUX.s00351.374 | Hypothetical protein LOAG_02391                                 | -2.76                         | -3.80                              |
| BUX.s01653.301 | Hypothetical protein CAEBREN_14780                              | -2.75                         | -2.89                              |
| BUX.s00713.6   | 2.96412e-66/Protein R57.2                                       | -2.74                         | -2.22                              |
| BUX.s00110.32  | 3-oxoacyl-[acyl-carrier-protein] reductase                      | -2.74                         | -7.96                              |
| BUX.s01150.21  | CBN-DAO-2 protein                                               | -2.74                         | -2.77                              |
| BUX.s01143.56  | Hypothetical protein CAEBREN_30296                              | -2.74                         | -2.67                              |
| BUX.s00961.65  | Protein F29G6.1                                                 | -2.73                         | -2.39                              |
| BUX.s00351.368 | Hypothetical protein Bm1_05905                                  | -2.72                         | -4.25                              |
| BUX.s00422.593 | Protein LIT-1, isoform d                                        | -2.72                         | -2.74                              |
| BUX.s00119.69  |                                                                 | -2.72                         | -4.33                              |
| BUX.s00422.548 | Angiotensin-converting enzyme family protein                    | -2.72                         | -2.74                              |
| BUX.s00579.202 | 3-oxoacyl-[acyl-carrier-protein] reductase                      | -2.72                         | -7.73                              |
| BUX.s01109.245 | Hint module family protein                                      | -2.70                         | -2.48                              |
| BUX.s01259.35  | Macrophage migration inhibitory factor                          | -2.70                         | -6.86                              |
| BUX.s00713.800 | <i>C. briggsae</i> CBR-FMO-4 protein                            | -2.69                         | -6.36                              |

Table S3. Cont.

| Gene ID        | Annotation                                         | Change Fold in<br>Bx_b (Fold) | Change Fold in<br>Bx_Fungus (Fold) |
|----------------|----------------------------------------------------|-------------------------------|------------------------------------|
| BUX.s00117.41  |                                                    | -2.68                         | -2.07                              |
| BUX.s01653.160 | PAN domain-containing protein                      | -2.67                         | -3.78                              |
| BUX.s01226.46  | Hypothetical protein CAEBREN_15384                 | -2.67                         | -9.72                              |
| BUX.s01653.324 |                                                    | -2.67                         | -5.70                              |
| BUX.s00116.625 | CBN-CLEC-180 protein                               | -2.67                         | -3.17                              |
| BUX.s01438.105 | Hypothetical protein CAEBREN_19046                 | -2.66                         | -2.84                              |
| BUX.s00579.725 | Protein BUS-8                                      | -2.66                         | -2.59                              |
| BUX.s00088.1   | <i>C. briggsae</i> CBR-COL-88 protein              | -2.65                         | -2.20                              |
| BUX.s00333.161 | Hypothetical protein CRE_12182                     | -2.64                         | -3.10                              |
| BUX.s00460.415 |                                                    | -2.64                         | -2.46                              |
| BUX.s01513.177 | Protein MLT-10                                     | -2.64                         | -3.67                              |
| BUX.s00116.413 | Protein MAM-3                                      | -2.63                         | -2.11                              |
| BUX.s01187.48  | Bovine pancreatic trypsin inhibitor domain protein | -2.63                         | -2.63                              |
| BUX.s00773.15  |                                                    | -2.63                         | -3.60                              |
| BUX.s00351.310 | Hypothetical protein WUBG_04316                    | -2.62                         | -8.15                              |
| BUX.s00983.5   | Cathepsin B-like cysteine proteinase               | -2.61                         | -3.41                              |
| BUX.s01092.260 | Hypothetical protein CAEBREN_32008                 | -2.61                         | -2.66                              |
| BUX.s01145.90  |                                                    | -2.61                         | -3.08                              |
| BUX.s00579.731 | Flavin-binding monooxygenase-like family protein   | -2.59                         | -2.73                              |
| BUX.s00294.36  | Hypothetical protein WUBG_04670                    | -2.58                         | -3.43                              |
| BUX.s01147.22  |                                                    | -2.58                         | -3.50                              |
| BUX.s00713.915 | Hypothetical protein CRE_18869                     | -2.57                         | -3.11                              |
| BUX.s00298.59  |                                                    | -2.56                         | -2.01                              |
| BUX.s00422.72  | Protein K02E10.4, isoform a                        | -2.56                         | -2.61                              |
| BUX.s00116.766 | Hypothetical protein CAEBREN_14873                 | -2.56                         | -2.10                              |
| BUX.s00351.311 | Hypothetical protein LOAG_04534                    | -2.55                         | -2.20                              |
| BUX.s00540.1   | Hypothetical protein CAEBREN_15368                 | -2.54                         | -2.42                              |
| BUX.s01281.22  | Hypothetical protein WUBG_11029, partial           | -2.54                         | -2.62                              |
| BUX.s01513.56  | Hypothetical protein DAPPUDRAFT_223767             | -2.53                         | -2.80                              |
| BUX.s01661.68  | Hypothetical protein CRE_04031                     | -2.53                         | -2.84                              |
| BUX.s01254.375 |                                                    | -2.53                         | -2.61                              |
| BUX.s01175.26  | Protein H03E18.1                                   | -2.53                         | -2.22                              |
| BUX.s00725.3   | Hypothetical protein CRE_04036                     | -2.51                         | -2.32                              |
| BUX.s01144.123 | Protein K08B12.1                                   | -2.51                         | -4.27                              |
| BUX.s00600.121 | Hypothetical protein CAEBREN_16537                 | -2.51                         | -2.05                              |
| BUX.s01144.243 | Protein F53B1.4                                    | -2.51                         | -2.21                              |
| BUX.s01109.55  | Hypothetical protein CRE_04039                     | -2.50                         | -2.07                              |
| BUX.s01513.308 | Protein GRD-15                                     | -2.50                         | -2.74                              |
| BUX.s00669.25  | Protein DCT-5                                      | -2.50                         | -2.09                              |
| BUX.s01038.225 | <i>C. briggsae</i> CBR-COL-130 protein             | -2.49                         | -2.19                              |
| BUX.s00139.93  |                                                    | -2.49                         | -2.73                              |
| BUX.c04026.1   |                                                    | -2.49                         | -3.39                              |
| BUX.s00422.270 | Protein MUA-3, isoform a                           | -2.49                         | -2.52                              |
| BUX.s00351.229 | Hypothetical protein CAEBREN_04806                 | -2.48                         | -3.18                              |
| BUX.s00983.2   | Hypothetical protein LOAG_17799                    | -2.47                         | -2.47                              |
| BUX.s00520.28  | Fatty aldehyde dehydrogenase                       | -2.46                         | -2.50                              |
| BUX.s00609.23  | <i>C. briggsae</i> CBR-DHS-29 protein              | -2.45                         | -2.74                              |
| BUX.s01150.18  | CRE-MLT-8 protein                                  | -2.45                         | -2.47                              |
| BUX.s01147.224 |                                                    | -2.44                         | -2.83                              |
| BUX.s01187.10  | Protein GRD-6                                      | -2.44                         | -2.52                              |
| BUX.s01656.43  | Hypothetical protein CAEBREN_24487                 | -2.42                         | -2.57                              |
| BUX.s00705.56  | Hypothetical protein CRE_12377                     | -2.42                         | -2.06                              |
| BUX.s00128.24  | Uncharacterized protein LOC100898457               | -2.42                         | -2.61                              |
| BUX.s01259.104 |                                                    | -2.41                         | -3.67                              |
| BUX.s01661.67  | Protein NEP-17, isoform a                          | -2.40                         | -3.93                              |
| BUX.s01149.104 | <i>C. briggsae</i> CBR-LET-2 protein               | -2.38                         | -2.24                              |
| BUX.s01254.265 | Hypothetical protein CRE_12586                     | -2.37                         | -3.99                              |

Table S3. Cont.

| Gene ID        | Annotation                             | Change Fold in Bx_b (Fold) | Change Fold in Bx_Fungus (Fold) |
|----------------|----------------------------------------|----------------------------|---------------------------------|
| BUX.s01281.86  |                                        | -2.37                      | -2.02                           |
| BUX.s00116.457 | Cytosolic glutathione S-transferase 2  | -2.37                      | -3.35                           |
| BUX.s00351.217 | Hypothetical protein LOAG_17817        | -2.36                      | -2.79                           |
| BUX.s01281.338 | Hypothetical protein LOAG_07526        | -2.36                      | -2.01                           |
| BUX.s00422.384 | Collagen alpha-3(VI) chain             | -2.36                      | -2.48                           |
| BUX.s00422.474 | Hypothetical protein LOAG_01102        | -2.35                      | -2.38                           |
| BUX.s01144.296 | Hypothetical protein CAEBREN_21159     | -2.35                      | -2.27                           |
| BUX.s00804.3   | Nuclear Hormone Receptor family member | -2.35                      | -2.98                           |
| BUX.s01198.107 |                                        | -2.35                      | -3.45                           |
| BUX.s00351.421 | Protein T23E7.2, isoform b             | -2.35                      | -3.36                           |
| BUX.s01167.15  |                                        | -2.34                      | -3.93                           |
| BUX.s01066.66  |                                        | -2.34                      | -2.13                           |
| BUX.s01109.586 | Protein COL-125                        | -2.33                      | -4.52                           |
| BUX.s00298.36  | Protein W01A11.1                       | -2.32                      | -2.80                           |
| BUX.s00364.188 | Collagen $\alpha$ -1(IV) chain         | -2.32                      | -2.40                           |
| BUX.s00116.405 | Zinc finger protein, partial           | -2.32                      | -2.99                           |
| BUX.s00139.92  |                                        | -2.30                      | -2.52                           |
| BUX.s00579.148 | Protein COL-171                        | -2.30                      | -3.85                           |
| BUX.s01198.149 | CRE-TAG-163 protein                    | -2.29                      | -2.95                           |
| BUX.s00983.4   | Cathepsin B-like proteinase            | -2.28                      | -2.34                           |
| BUX.s00773.31  |                                        | -2.27                      | -5.16                           |
| BUX.s01268.26  | Hypothetical protein CAEBREN_12945     | -2.25                      | -3.37                           |
| BUX.s01167.13  | Protein NOAH-1, isoform b              | -2.25                      | -3.34                           |
| BUX.s01144.303 | <i>C. briggsae</i> CBR-DPY-6 protein   | -2.24                      | -5.00                           |
| BUX.s00579.210 | CRE-NAS-37 protein                     | -2.24                      | -4.34                           |
| BUX.s00139.110 | Protein Y53F4B.25                      | -2.24                      | -2.32                           |
| BUX.s01147.18  |                                        | -2.23                      | -3.92                           |
| BUX.s01653.425 | Hypothetical protein CBG18576          | -2.23                      | -5.27                           |
| BUX.s00252.85  | Cuticle collagen dpy-7                 | -2.22                      | -4.31                           |
| BUX.s01109.553 | PAN domain-containing protein, partial | -2.21                      | -2.24                           |
| BUX.s01268.51  |                                        | -2.20                      | -3.22                           |
| BUX.s00036.121 |                                        | -2.19                      | -4.02                           |
| BUX.s01167.35  | Protein C49A1.10                       | -2.19                      | -3.23                           |
| BUX.s00508.22  | Hypothetical protein WUBG_08140        | -2.18                      | -2.26                           |
| BUX.s01337.71  |                                        | -2.18                      | -2.35                           |
| BUX.s00351.300 | Hypothetical protein CRE_07231         | -2.18                      | -2.06                           |
| BUX.s01281.370 | Hypothetical protein CRE_11835         | -2.18                      | -2.27                           |
| BUX.s01143.87  | CBN-BUS-19 protein                     | -2.18                      | -2.10                           |
| BUX.s01038.251 | Hypothetical protein CBG01351          | -2.17                      | -8.06                           |
| BUX.s01513.218 |                                        | -2.17                      | -2.49                           |
| BUX.s00579.63  | Hypothetical protein CAEBREN_01577     | -2.16                      | -2.83                           |
| BUX.c03499.1   |                                        | -2.16                      | -2.53                           |
| BUX.s00713.55  | Hypothetical protein CRE_16635         | -2.16                      | -2.22                           |
| BUX.s01147.185 | Protein T10G3.3                        | -2.16                      | -3.64                           |
| BUX.s01038.7   | Hypothetical protein CRE_05305         | -2.14                      | -2.54                           |
| BUX.s01149.42  | Hypothetical protein CBG15681          | -2.14                      | -3.00                           |
| BUX.s00351.233 | DnaJ domain containing protein         | -2.14                      | -2.26                           |
| BUX.s01660.62  | Hypothetical protein WUBG_04506        | -2.14                      | -2.58                           |
| BUX.s00466.158 | Hypothetical protein Cbre_JD09.001     | -2.13                      | -2.79                           |
| BUX.s00460.124 | Protein PHG-1                          | -2.13                      | -2.12                           |
| BUX.s01259.60  | Hypothetical protein CRE_28748         | -2.13                      | -2.10                           |
| BUX.s00713.352 |                                        | -2.13                      | -2.48                           |
| BUX.s00116.743 | Hypothetical protein CBG01832          | -2.13                      | -3.70                           |
| BUX.s00460.36  | Protein COL-48                         | -2.13                      | -2.51                           |
| BUX.s01038.223 | Intermediate filament protein HG-IF1   | -2.12                      | -3.19                           |
| BUX.s00579.724 | Protein BUS-17                         | -2.12                      | -3.41                           |
| BUX.s01656.64  | Talin 1                                | -2.12                      | -2.10                           |

Table S3. Cont.

| Gene ID         | Annotation                                 | Change Fold in<br>Bx_b (Fold) | Change Fold in<br>Bx_Fungus (Fold) |
|-----------------|--------------------------------------------|-------------------------------|------------------------------------|
| BUX.s00116.616  | Hypothetical protein CRE_10276             | -2.12                         | -4.73                              |
| BUX.s00579.219  | Hypothetical protein LOAG_05745            | -2.12                         | -2.26                              |
| BUX.s01144.160  | Nuclear Hormone Receptor family member     | -2.12                         | -3.05                              |
| BUX.s01092.110  | Hypothetical protein LOC100637862, partial | -2.12                         | -2.56                              |
| BUX.s00713.1153 |                                            | -2.11                         | -3.20                              |
| BUX.s01066.173  |                                            | -2.11                         | -3.00                              |
| BUX.s00242.1    | Protein HCH-1                              | -2.11                         | -2.59                              |
| BUX.s00333.154  | Hypothetical protein LOAG_12148            | -2.11                         | -3.00                              |
| BUX.s01142.2    | Collagen protein                           | -2.11                         | -3.88                              |
| BUX.s00460.53   | Hypothetical protein LOAG_12928            | -2.10                         | -4.79                              |
| BUX.s01187.44   | CBN-LIPL-6 protein                         | -2.10                         | -3.15                              |
| BUX.s00351.326  | Hypothetical protein LOAG_16969            | -2.10                         | -2.51                              |
| BUX.s01109.509  | Hypothetical protein CBG13113              | -2.10                         | -2.64                              |
| BUX.s01297.1    | Hypothetical protein LOAG_18663            | -2.10                         | -2.61                              |
| BUX.s01145.15   | Protein LGC-22, isoform b                  | -2.10                         | -2.34                              |
| BUX.s00116.759  | <i>C. briggsae</i> CBR-PHY-2 protein       | -2.10                         | -2.00                              |
| BUX.s01513.114  | Hypothetical protein Bm1_06695             | -2.09                         | -2.02                              |
| BUX.s01144.187  | Aspartic protease 2A                       | -2.09                         | -3.84                              |
| BUX.s00579.72   |                                            | -2.08                         | -7.59                              |
| BUX.s00713.819  | 2-acylglycerol O-acyltransferase 2         | -2.08                         | -2.05                              |
| BUX.s01518.97   | Protein E04D5.4, isoform a                 | -2.08                         | -3.11                              |
| BUX.s01254.23   | Short-chain Dehydrogenase, partial         | -2.07                         | -7.39                              |
| BUX.s01653.404  | hypothetical protein LOAG_00505            | -2.06                         | -2.85                              |
| BUX.s01518.84   | Hypothetical protein Bm1_12890             | -2.06                         | -2.24                              |
| BUX.s00713.927  | Reductase SDR family member 1-like         | -2.05                         | -7.17                              |
| BUX.s00116.581  | Major allergen                             | -2.05                         | -5.31                              |
| BUX.s01661.59   | Protein UNC-62, isoform a                  | -2.05                         | -2.25                              |
| BUX.s00579.141  |                                            | -2.04                         | -3.83                              |
| BUX.s00578.1    | Cadherin domain containing protein         | -2.04                         | -2.15                              |
| BUX.s00813.102  | Hypothetical protein CRE_00277             | -2.03                         | -3.70                              |
| BUX.s01659.4    | <i>C. briggsae</i> CBR-PCP-1.1 protein     | -2.03                         | -2.43                              |
| BUX.c03203.1    | Hypothetical protein CAEBREN_02229         | -2.03                         | -4.29                              |
| BUX.s00128.19   | Protein ASM-3, isoform a                   | -2.03                         | -2.29                              |
| BUX.s00351.416  | Hypothetical protein CAEBREN_23751         | -2.03                         | -2.33                              |
| BUX.s01143.167  |                                            | -2.02                         | -2.93                              |
| BUX.s00333.7    | Hypothetical protein CAEBREN_07108         | -2.02                         | -2.73                              |
| BUX.s00773.30   |                                            | -2.02                         | -3.27                              |
| BUX.s01142.36   | Tetraspanin family protein                 | -2.01                         | -2.94                              |
| BUX.s00259.2    | Hypothetical protein CRE_17148             | -2.01                         | -2.51                              |
| BUX.s00460.191  | Trehalose-6-phosphate hydrolase            | 2.00                          | 2.28                               |
| BUX.s01147.184  | Protease, serine, 22                       | 2.02                          | 2.05                               |
| BUX.c06670.1    |                                            | 2.04                          | 2.29                               |
| BUX.s00063.1    | CBN-CYP-33D1 protein                       | 2.05                          | 3.26                               |
| BUX.s00460.290  |                                            | 2.05                          | 2.01                               |
| BUX.s01254.165  |                                            | 2.09                          | 2.44                               |
| BUX.s00351.40   | Thrombin inhibitor haemalin                | 2.11                          | 3.29                               |
| BUX.s00302.1    |                                            | 2.19                          | 2.85                               |
| BUX.s01066.133  |                                            | 2.22                          | 2.22                               |
| BUX.s01089.1    | CRE-STR-135 protein                        | 2.25                          | 3.33                               |
| BUX.s00813.54   | cathepsin                                  | 2.25                          | 2.04                               |
| BUX.s00055.336  | Metallo-beta-lactamase superfamily protein | 2.26                          | 2.51                               |
| BUX.s00813.53   | Cathepsin                                  | 2.30                          | 2.20                               |
| BUX.s00647.196  |                                            | 2.31                          | 2.66                               |
| BUX.s01656.34   |                                            | 2.39                          | 2.25                               |
| BUX.s00036.74   | Zinc metallopeptidase 2 MEP2               | 2.40                          | 2.25                               |
| BUX.s01254.60   | CBN-DHS-20 protein                         | 2.46                          | 3.85                               |

Table S3. Cont.

| Gene ID         | Annotation                                | Change Fold in Bx_b (Fold) | Change Fold in Bx_Fungus (Fold) |
|-----------------|-------------------------------------------|----------------------------|---------------------------------|
| BUX.s00116.221  | CRE-TAG-89 protein                        | 2.48                       | 2.71                            |
| BUX.s00579.85   | Venom allergen-like protein VAP1          | 2.49                       | 2.73                            |
| BUX.s00647.87   |                                           | 2.54                       | 3.89                            |
| BUX.s01143.152  | Histone-lysine N-methyltransferase SETMAR | 2.59                       | 2.97                            |
| BUX.s00333.185  | CRE-SRH-276 protein                       | 2.65                       | 2.76                            |
| BUX.s01661.72   | Protein NEP-17, isoform a                 | 2.77                       | 2.47                            |
| BUX.s00713.60   | PHD finger-like domain protein 5A         | 2.93                       | 3.33                            |
| BUX.s01144.145  | Protein SRH-264                           | 3.00                       | 3.36                            |
| BUX.s00713.1015 |                                           | 3.00                       | 4.00                            |
| BUX.s00813.52   | Cathepsin                                 | 3.12                       | 2.42                            |
| BUX.s01145.123  |                                           | 3.21                       | 2.63                            |
| BUX.s00364.261  | Hemoglobinase-type cysteine proteinase    | 3.25                       | 3.65                            |
| BUX.s01337.81   |                                           | 3.38                       | 2.54                            |
| BUX.s00647.111  | Glutathione S-transferase S1              | 3.39                       | 2.49                            |
| BUX.s00813.51   | Cathepsin                                 | 3.62                       | 2.24                            |
| BUX.s00647.197  |                                           | 3.71                       | 4.60                            |
| BUX.s01044.1    |                                           | 5.50                       | 6.50                            |
| BUX.s00713.1054 |                                           | 6.00                       | 5.50                            |

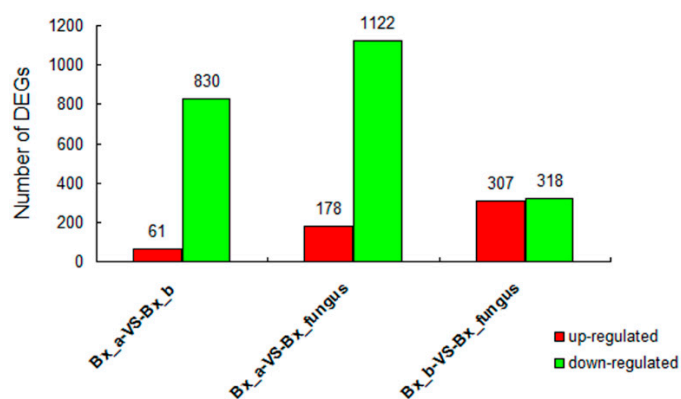

**Figure S1.** Genes most differentially expressed in the three different treated samples of *B. xylophilus*. Bx\_a: aseptic *B. xylophilus*; Bx\_b: *B. xylophilus* treated with *S. maltophilia* NSPmBx03; Bx\_fungus: fungus *B. xylophilus*.
